# Supplementary material
Source: PubMed Central journal article supplement (PMC7906707)
Supplement: mmc1.pdf [file mmc1.pdf]

# THE LANCET

## Respiratory Medicine

### Supplementary appendix

This appendix formed part of the original submission and has been peer reviewed. We post it as supplied by the authors.

Supplement to: Feld JJ, Kandel C, Biondi MJ, et al. Peginterferon lambda for the treatment of outpatients with COVID-19: a phase 2, placebo-controlled randomised trial. *Lancet Respir Med* 2021; published online Feb 5. [http://dx.doi.org/10.1016/S2213-2600\(20\)30566-X](http://dx.doi.org/10.1016/S2213-2600(20)30566-X).

## Supplementary Appendix

This appendix has been provided by the authors to give readers additional information about their work.

Supplement to: Feld JJ, Kandel C, Biondi MJ, *et al.* Peginterferon-lambda for the treatment of COVID-19 in outpatients: A phase 2, placebo-controlled randomized trial

## Supplementary Appendix

|                             |    |
|-----------------------------|----|
| Supplemental Methods .....  | 3  |
| Supplemental Figure 1 ..... | 4  |
| Supplemental Figure 2 ..... | 5  |
| Supplemental Figure 3 ..... | 6  |
| Supplemental Figure 4 ..... | 7  |
| Supplemental Figure 5 ..... | 8  |
| Supplemental Table 1 .....  | 9  |
| Supplemental Table 2 .....  | 10 |
| Supplemental Table 3 .....  | 11 |
| Supplemental Table 4.....   | 12 |
| References.....             | 13 |

## **Supplemental Methods**

### **SARS-CoV-2 Viral Load Testing**

A self-collected mid-turbinate swab was obtained. Briefly, 400  $\mu$ L of viral transport media was taken from the mid-turbinate swab inactivated and viral nucleic acid was extracted using the NucliSENS EasyMAG platform (bioMerieux, Marcy-l'Etoile, France), and one-step Reverse Transcriptase quantitative PCR was performed on the Rotorgene Q as previously described (Qiagen, Hilden, Germany) using the primers and probes for the SARS-CoV-2 E gene(1, 2). To generate standard curves, dilutions of a synthetic plasmid containing a segment of the E-gene were used (GenScript, USA). Ct values were obtained for both the plasmid-derived standards and samples. The number of viral copies per  $\mu$ L (then converted to mL as established for viral nucleic acid quantification) was determined based on the known initial concentration and then dilutions of the plasmid stock. Interpolation of the samples was carried out using GraphPad Prism. Copies/mL is an established measurement in traditional assays for viral quantification and has been also used in the context of SARS-CoV-2 quantification(3-6). Samples with either no Ct value or a value that was below the level of quantification were counted as negative. The lower limit of detection of 20 copies/mL was established using repeated testing of titred SARS-CoV-2 stocks. For the purposes of calculation, values below the limit of quantification ( $\sim$ 20 copies/mL) were given an arbitrary value of 10 copies/mL.

**Figure S1. Time to viral clearance in those with baseline viral load  $\geq 10E6$  copies/mL.** The time to undetectable SARS-CoV-2 RNA is shown for the peginterferon-lambda and the placebo group for participants with a baseline viral load above  $10E6$  copies/mL. The curves are compared using the log-rank test and the median time to clearance with 95% CI is shown for each group.

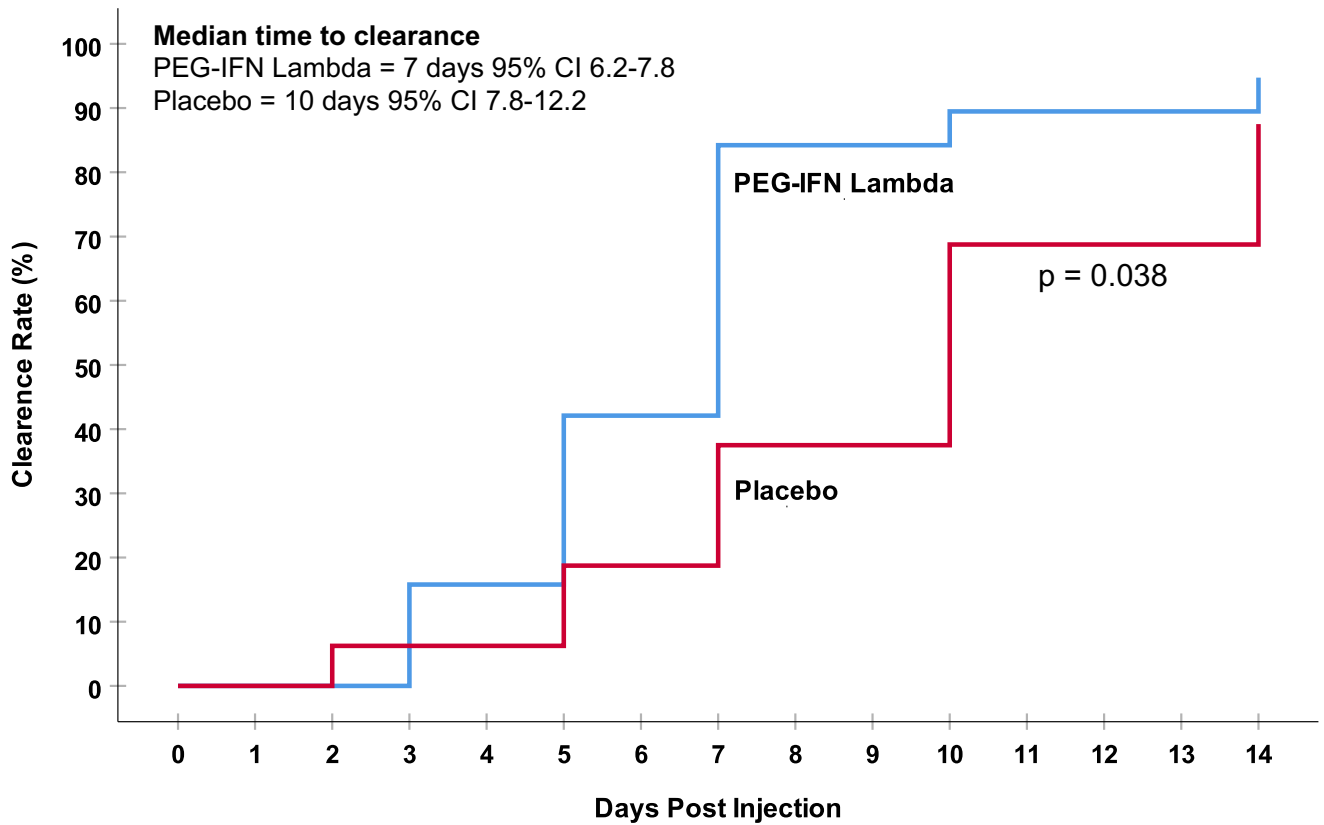

**Figure S2. Proportion negative for SARS-CoV-2 RNA over time and mean absolute and change in SARS-CoV-2 viral load over time in those with detectable SARS-CoV-2 at baseline.** The proportion of patients negative for SARS-CoV-2 RNA per day post-injection in those with a detectable viral load at baseline (Panel a) with the mean SARS-CoV-2 RNA viral load (Panel b) and log decline from baseline over time (Panel c) in participants with a detectable baseline viral load in the peginterferon-lambda treatment (n=25) and placebo groups (n=20). \*Panel b: Difference at Day 7 p=0.042. \*Panel c: Difference at Day 5 p=0.036 and Day 7 p=0.006.

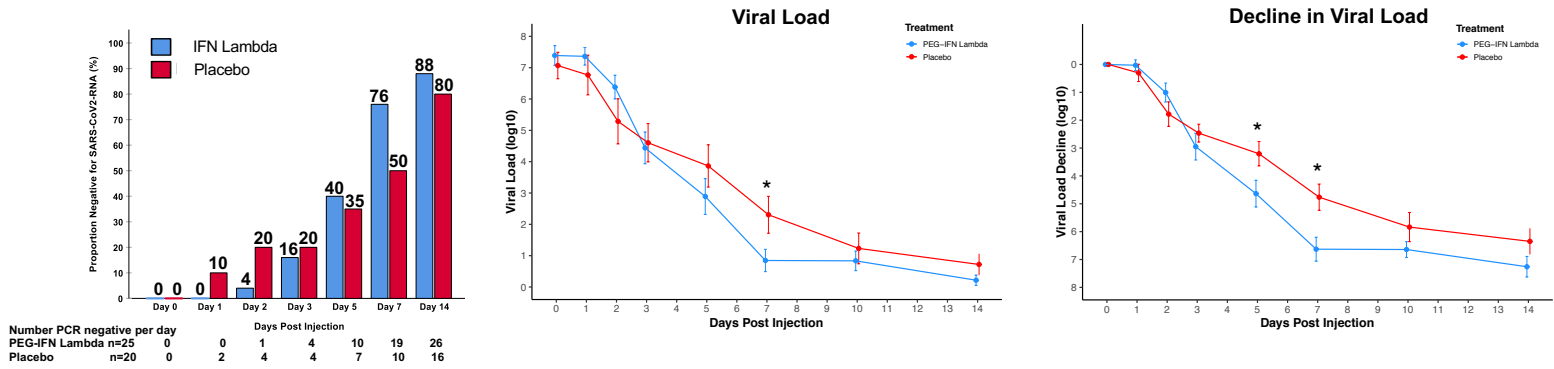

**Figure S3. Odds ratio for clearance by Day 7 with peginterferon-lambda vs placebo, controlled for individual baseline covariates, in those with baseline viral load  $\geq 10E6$  copies/mL.** Forest plot showing odds ratio with 95% CI for the odds of clearance by Day 7 with peginterferon lambda treatment compared to placebo, controlled for each individual (bivariate) covariate.

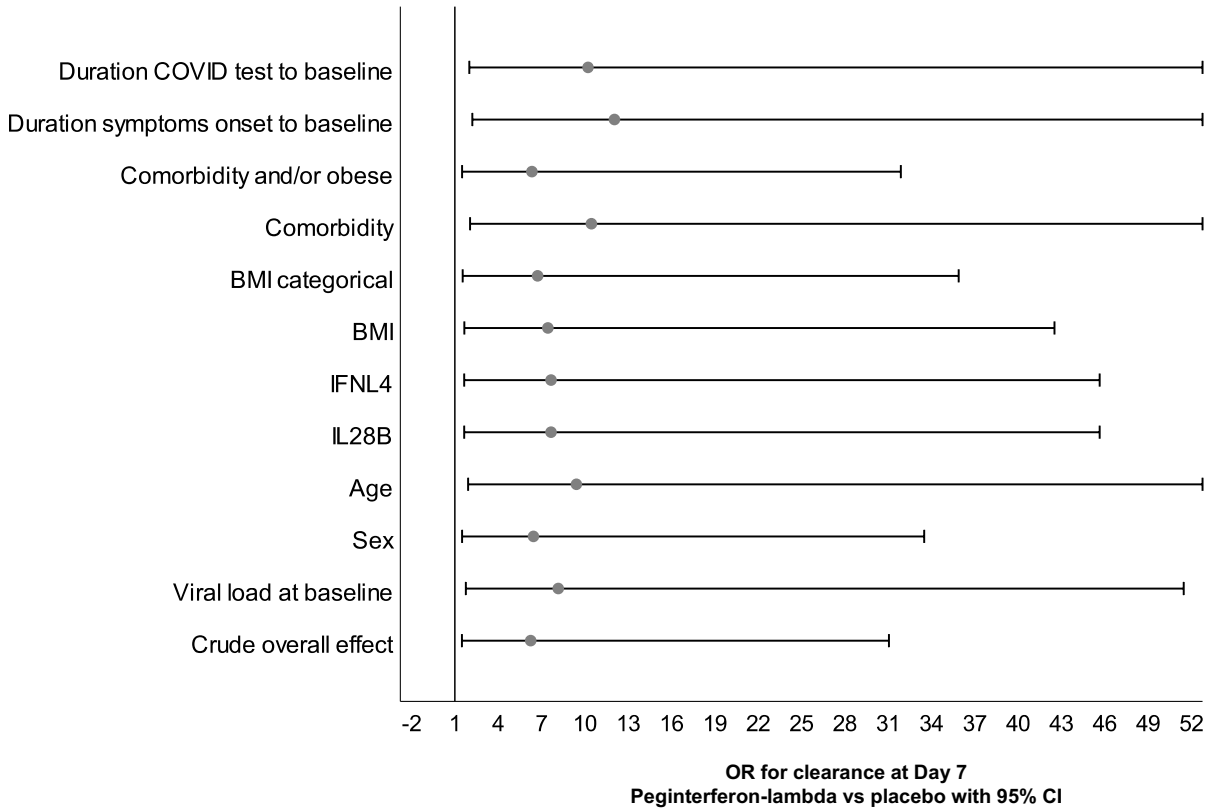

**Figure S4. Presence of SARS-CoV-2 antibodies over time stratified by baseline viral load.**  
 The proportion of individuals with positive anti-SARS-CoV-2 S protein IgG antibodies per day post-injection, stratified by baseline viral load above or below 10E6 copies/mL.

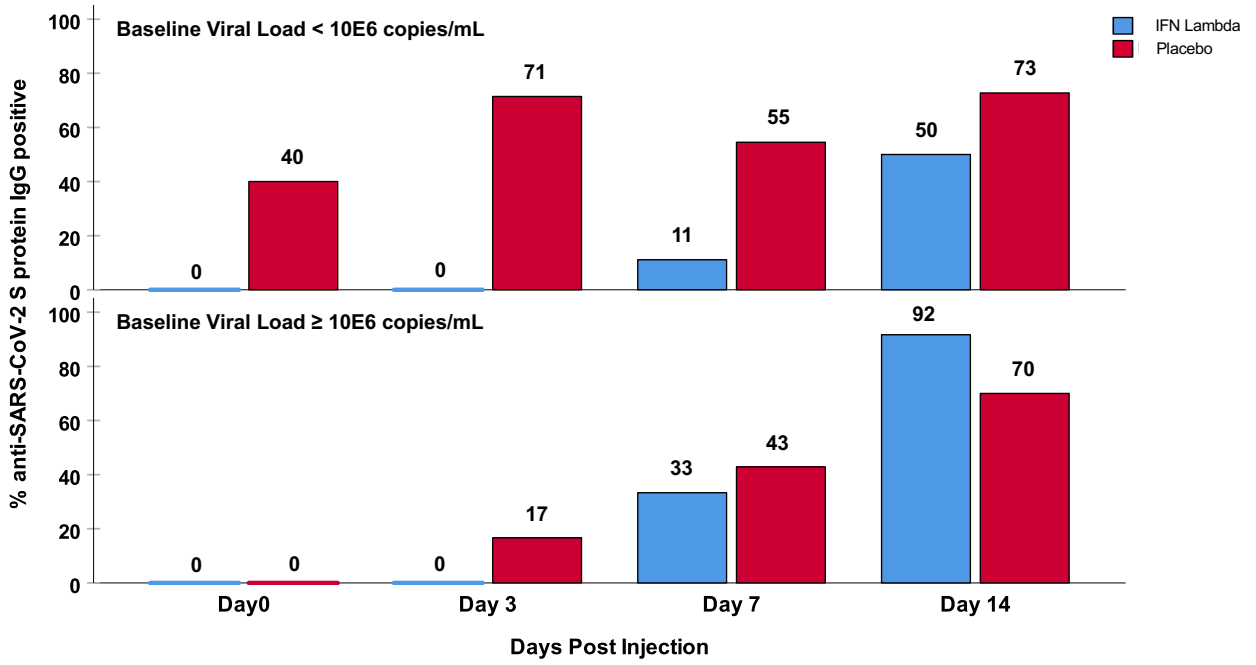



**Figure S5. Self-collected oral temperature measurements.** Self-collected oral temperature measurements on days 0, 2, 3, 4, 5, 6, 7, 10, 12 and 14 separated into <38° Celsius, 38-39° Celsius and above 39° Celsius stratified by group.

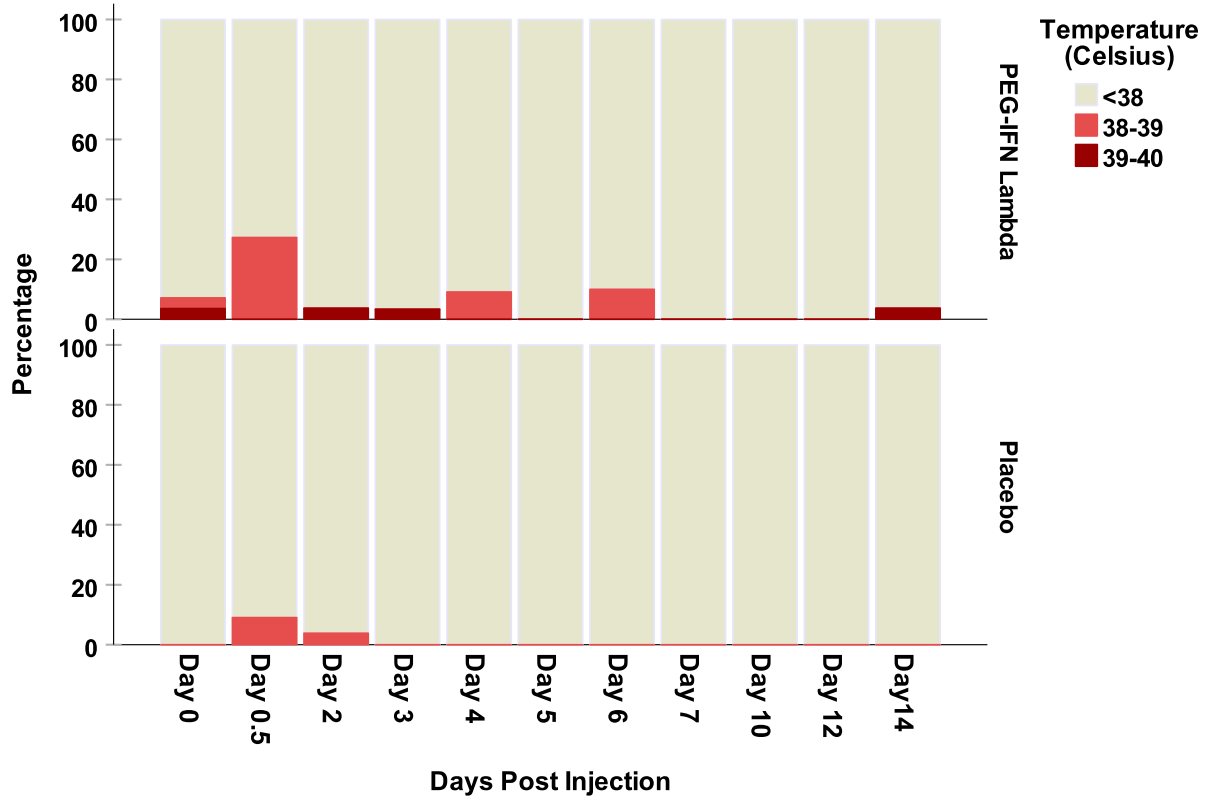

**Table S1. Residual SARS-CoV-2 RNA levels at Day 7 post-treatment in those with baseline viral loads above and below 10E6 copies/mL**

| Baseline Viral Load        | Residual Baseline Viral Load at Day 7 in Copies/mL       |                                                                                                                         |
|----------------------------|----------------------------------------------------------|-------------------------------------------------------------------------------------------------------------------------|
|                            | Peginterferon-Lambda                                     | Placebo                                                                                                                 |
| <b>≥ 10E6 copies/mL</b>    | n=4/19 (21%)<br><br>2.74E3<br>4.59E3<br>7.95E3<br>8.58E5 | n=10/16 (62.5%)<br><br>1.61E1<br>3.10E2<br>5.10E3<br>4.28E4<br>1.46E5<br>1.66E5<br>2.62E5<br>4.17E5<br>6.49E5<br>6.40E6 |
| <b>&lt; 10E6 copies/mL</b> | n=2/11 (18%)<br><br>2.41E3<br>Missing                    | n=1/14 (7%)<br><br>1.82E3                                                                                               |

**Table S2. Categorization of symptoms that were assessed daily into whether they were likely attributed to COVID-19, peginterferon-lambda or either/both.**

| <b>Symptom Category</b>        | <b>Symptom</b>                  | <b>COVID-19</b> | <b>Peginterferon-Lambda</b> |
|--------------------------------|---------------------------------|-----------------|-----------------------------|
| <b>Systemic</b>                | Fever                           | X               | X                           |
|                                | Chills                          | X               | X                           |
|                                | Rigors                          | X               | X                           |
|                                | Fatigue                         | X               | X                           |
| <b>Respiratory</b>             | Cough                           | X               |                             |
|                                | Sore Throat                     | X               |                             |
|                                | Shortness of breath             | X               |                             |
|                                | Chest pain                      | X               |                             |
|                                | Runny nose                      | X               |                             |
|                                | Conjunctivitis                  | X               |                             |
| <b>Gastrointestinal</b>        | Abdominal pain                  | X               |                             |
|                                | Nausea                          | X               |                             |
|                                | Vomiting                        | X               |                             |
|                                | Diarrhea                        | X               |                             |
| <b>Musculoskeletal</b>         | Muscle Pain                     | X               | X                           |
| <b>Skin</b>                    | Rash                            |                 | X                           |
|                                | Itch                            |                 | X                           |
|                                | Injection Site Reaction         |                 | X                           |
| <b>Mood</b>                    | Depressed Mood                  | X               | X                           |
| <b>Neurologic and Vascular</b> | Loss of smell                   | X               |                             |
|                                | Loss of taste                   | X               |                             |
|                                | Change in color of fingers/toes | X               |                             |

**Table S3. Association between peginterferon-lambda treatment vs placebo with specific symptom categories and with symptom evolution over time. Results shown for all participants and stratified by baseline viral load.**

| Symptom Category    | Change in severity (day)      | All samples        |         | Baseline Viral Load $\geq 10E6$ copies/mL |         | Baseline Viral Load $< 10E6$ copies/mL |         |
|---------------------|-------------------------------|--------------------|---------|-------------------------------------------|---------|----------------------------------------|---------|
|                     |                               | OR (95% CI)        | p-value | OR (95% CI)                               | p-value | OR (95% CI)                            | p-value |
| All Symptoms        | Peginterferon-lambda          | 0.71 (0.61, 0.82)  | <.0001  | 0.74 (0.62, 0.88)                         | 0.0007  | 0.68 (0.53, 0.87)                      | 0.0024  |
|                     | Placebo                       | 0.64 (0.55, 0.75)  | <.0001  | 0.60 (0.48, 0.74)                         | <.0001  | 0.76 (0.60, 0.96)                      | 0.019   |
|                     | <i>Difference in decline*</i> | 3.15 (0.77, 12.9)  | 0.11    | 2.39 (0.48-11.8)                          | 0.28    | 1.64 (0.15, 17.5)                      | 0.68    |
| Fever/Systemic      | Peginterferon-lambda          | 0.72 (0.62, 0.84)  | <.0001  | 0.77 (0.67, 0.90)                         | 0.0008  | 0.64 (0.53, 0.77)                      | <.0001  |
|                     | Placebo                       | 0.60 (0.49, 0.73)  | <.0001  | 0.64 (0.52, 0.77)                         | <.0001  | 0.55 (0.43, 0.69)                      | <.0001  |
|                     | <i>Difference in decline</i>  | 1.69 (0.42, 6.81)  | 0.46    | 1.24 (0.30, 5.23)                         | 0.76    | 4.83 (0.11, 205)                       | 0.41    |
| Respiratory         | Peginterferon-lambda          | 0.64 (0.51, 0.80)  | <.0001  | 0.70 (0.55, 0.88)                         | 0.002   | 0.48 (0.26, 0.91)                      | 0.024   |
|                     | Placebo                       | 0.52 (0.39, 0.69)  | <.0001  | 0.58 (0.42, 0.78)                         | 0.0004  | 0.41 (0.20, 0.83)                      | 0.013   |
|                     | <i>Difference in decline</i>  | 4.67 (0.91, 23.9)  | 0.064   | 5.88 (0.81, 42.4)                         | 0.076   | 3.67 (0.19, 70.1)                      | 0.39    |
| Gastrointestinal    | Peginterferon-lambda          | 0.92 (0.75, 1.15)* | 0.47    | 0.92 (0.83, 1.01)*                        | 0.091   | 0.98 (0.74, 1.3)*                      | 0.90    |
|                     | Placebo                       | 0.57 (0.42, 0.77)  | 0.0003  | 0.53 (0.41, 0.69)                         | <.0001  | 0.61 (0.42, 0.9)                       | 0.013   |
|                     | <i>Difference in decline</i>  | 0.48 (0.086, 2.62) | 0.39    | 0.58 (0.093, 3.60)                        | 0.55    | 0.40 (0.001, 123)                      | 0.75    |
| Musculoskeletal     | Peginterferon-lambda          | 0.54 (0.35, 0.83)  | 0.005   | 0.51 (0.33, 0.8)                          | 0.003   | 0.63 (0.46, 0.85)                      | 0.003   |
|                     | Placebo                       | 0.50 (0.32, 0.77)  | 0.002   | 0.48 (0.31, 0.75)                         | 0.001   | 0.48 (0.20, 1.17)                      | 0.11    |
|                     | <i>Difference in decline</i>  | 1.78 (0.44, 7.26)  | 0.41    | 1.19 (0.35, 4.08)                         | 0.78    | 2.55 (0.05, 129)                       | 0.64    |
| Skin                | Peginterferon-lambda          | 0.89 (0.57, 1.38)  | 0.59    | 0.79 (0.37, 1.67)                         | 0.53    | 0.40 (0.02, 9.51)                      | 0.37    |
|                     | Placebo                       | 0.88 (0.57, 1.35)  | 0.56    | 0.50 (0.16, 1.60)                         | 0.24    | 0.91 (0.73, 1.13)                      | 0.22    |
|                     | <i>Difference in decline</i>  | 0.76 (0.097, 5.92) | 0.79    | 1.90 (0.075, 48.1)                        | 0.69    |                                        | 0.15    |
| Neurologic/Vascular | Peginterferon-lambda          | 0.68 (0.47, 0.98)  | 0.037   | 0.72 (0.53, 0.98)                         | 0.034   | 0.63 (0.48, 0.83)                      | 0.001   |
|                     | Placebo                       | 0.60 (0.36, 0.98)  | 0.043   | 0.63 (0.43, 0.93)                         | 0.019   | 0.51 (0.34, 0.76)                      | 0.001   |
|                     | <i>Difference in decline</i>  | 5.07 (0.24, 108)   | 0.30    | 2.61 (0.074, 92.8)                        | 0.60    | 1.60 (0.01, 266)                       | 0.86    |
| Mood                | Peginterferon-lambda          | 0.59 (0.29, 1.20)  | 0.14    | 0.64 (0.35, 1.19)                         | 0.16    | 0.56 (0.30, 1.07)                      | 0.077   |
|                     | Placebo                       | 0.34 (0.12, 0.98)  | 0.046   | 0.38 (0.13, 1.10)                         | 0.074   | 0.52 (0.29, 0.93)                      | 0.029   |
|                     | <i>Difference in decline</i>  | 0.90 (0.097, 8.4)  | 0.93    | 1.29 (0.065, 25.6)                        | 0.87    | 0.32 (0.02, 4.71)                      | 0.40    |

\* Difference in decline indicates the odds ratio for the difference in rate of improvement between peginterferon-lambda and placebo. Values greater than 1 indicate more rapid improvement with peginterferon-lambda treatment than with placebo.

**Table S4. The specific severe symptoms reported by participants in each treatment group.**

| <b>PegIFN<br/>Lambda</b> | <b>ID 3</b> | <b>ID 18</b>  | <b>ID 9</b> | <b>ID 15</b> | <b>ID 31</b> | <b>ID 47</b> | <b>ID 52</b> |
|--------------------------|-------------|---------------|-------------|--------------|--------------|--------------|--------------|
| <b>Day 0</b>             | throat      |               |             | smell        | smell        | smell        | smell        |
| <b>Day 0.5</b>           | throat      |               |             |              |              | smell        |              |
| <b>Day 1</b>             |             |               |             |              | smell        | smell        |              |
| <b>Day 2</b>             | fever       |               |             |              | smell        | smell        |              |
| <b>Day 3</b>             | cough       |               |             |              |              | smell        |              |
| <b>Day 4</b>             |             |               |             |              |              |              |              |
| <b>Day 5</b>             |             |               | smell       |              |              |              |              |
| <b>Day 6</b>             |             | cough,<br>SOB | smell       |              |              |              |              |
| <b>Day 7</b>             |             |               |             |              |              |              |              |
| <b>Day 10</b>            |             |               | smell       |              |              |              |              |
| <b>Day 12</b>            |             |               | smell       |              |              |              |              |
| <b>Day 14</b>            |             | cough,<br>SOB |             |              |              |              |              |

| <b>Placebo</b> | <b>ID 5</b> | <b>ID 11</b> | <b>ID 16</b>               | <b>ID 27</b> | <b>ID 33</b>                                             | <b>ID 51</b>         | <b>ID 60</b> |
|----------------|-------------|--------------|----------------------------|--------------|----------------------------------------------------------|----------------------|--------------|
| <b>Day 0</b>   | chills      |              | fever,<br>smell,<br>nausea | fatigue      | cough, fever, chills,<br>nausea, vomit                   | smell                |              |
| <b>Day 0.5</b> |             |              |                            |              | cough, throat                                            | fatigue,<br>headache |              |
| <b>Day 1</b>   |             |              |                            |              | cough, fever, chills,<br>throat, myalgia,<br>abdo, vomit | smell                |              |
| <b>Day 2</b>   |             |              | fatigue,<br>nausea         |              |                                                          | fatigue,<br>smell    |              |
| <b>Day 3</b>   |             |              | fatigue,<br>nausea         |              |                                                          | fatigue,<br>smell    |              |
| <b>Day 4</b>   |             | fatigue      | fatigue                    |              |                                                          |                      |              |
| <b>Day 5</b>   |             | fatigue      |                            |              |                                                          |                      | cough        |
| <b>Day 6</b>   |             |              |                            |              | diarrhea                                                 |                      |              |
| <b>Day 7</b>   |             |              |                            |              |                                                          |                      |              |
| <b>Day 10</b>  |             |              |                            |              |                                                          |                      |              |
| <b>Day 12</b>  |             |              |                            |              |                                                          |                      |              |
| <b>Day 14</b>  |             |              |                            |              |                                                          |                      |              |

Smell – loss of sense of smell/taste, SOB – shortness of breath; abdo – abdominal pain

## References

1. Corman VM, Landt O, Kaiser M, Molenkamp R, Meijer A, Chu DK, et al. Detection of 2019 novel coronavirus (2019-nCoV) by real-time RT-PCR. *Euro Surveill.* 2020;25(3).
2. Vermeiren C, Marchand-Senécal X, Sheldrake E, Bulir D, Smieja M, Chong S, et al. Comparison of Copan ESwab and FLOQSwab for COVID-19 Diagnosis: Working around a Supply Shortage. *J Clin Microbiol.* 2020;58(6).
3. Pujadas E, Chaudhry F, McBride R, Richter F, Zhao S, Wajnberg A, et al. SARS-CoV-2 viral load predicts COVID-19 mortality. *Lancet Respir Med.* 2020;8(9):e70.
4. Chen P, Nirula A, Heller B, Gottlieb RL, Boscia J, Morris J, et al. SARS-CoV-2 Neutralizing Antibody LY-CoV555 in Outpatients with Covid-19. *N Engl J Med.* 2020.
5. Regeneron. Regeneron's REGN-COV2 antibody cocktail reduced viral levels and improved symptoms in non-hospitalized COVID-19 patients 2020 [Available from: <https://investor.regeneron.com/news-releases/news-release-details/regenerons-regn-cov2-antibody-cocktail-reduced-viral-levels-and>].
6. Wölfel R, Corman VM, Guggemos W, Seilmaier M, Zange S, Müller MA, et al. Virological assessment of hospitalized patients with COVID-2019. *Nature.* 2020;581(7809):465-9.
